# Supplementary material for: Gene Expression Signature Analysis Identifies Vorinostat as a Candidate Therapy for Gastric Cancer
Source: PLoS One. 2011 Sep 9;6(9):e24662. doi: 10.1371/journal.pone.0024662 (PMC3170379; doi:10.1371/journal.pone.0024662)
Supplement: Table S1 — A list of 500 up regulated and 500 down regulated genes in gastric cancer, used as input query into Connectivity Map. (XLS) [file pone.0024662.s002.xls]

## Sheet: Sheet1
Table S1. A list of 500 up regulated and 500 down regulated genes in human gastric cancer, used as input query into Connectivity Map
Up		Down
Unique id	Gene symbol	Unique id	Gene symbol
ILMN_1753449	CST1	ILMN_1677711	LOC643834
ILMN_1813704	KIAA1199	ILMN_1687842	LOC649034
ILMN_1724686	CLDN1	ILMN_1703787	ATP4B
ILMN_1712522	CEACAM6	ILMN_1731547	GIF
ILMN_1723042	CLDN3	ILMN_1717572	PGA5
ILMN_1794863	CAMK2N1	ILMN_1727539	LOC643834
ILMN_1814015	CDH17	ILMN_1813688	GDDR
ILMN_1666845	KRT17	ILMN_1760103	GKN1
ILMN_1784459	MMP3	ILMN_1768750	LOC643834
ILMN_1689336	HOXA10	ILMN_1796405	ATP4B
ILMN_1793888	SERPINB5	ILMN_1714980	MRGPRD
ILMN_1689004	TNFRSF12A	ILMN_1696380	GHRL
ILMN_1881909		ILMN_1769143	KCNE2
ILMN_1651354	SPP1	ILMN_1669410	CHGA
ILMN_1779875	THY1	ILMN_1661994	ESRRG
ILMN_1701308	COL1A1	ILMN_1771538	PSCA
ILMN_1678842	THBS2	ILMN_1795582	CHRD
ILMN_1763196	WDR72	ILMN_1807503	CPA2
ILMN_1702363	SULF1	ILMN_1771680	ATP4B
ILMN_1780255	KLK6	ILMN_1759708	LOC643959
ILMN_1662130	POM121	ILMN_1795484	PGC
ILMN_1815619	CDX1	ILMN_1663919	TFF2
ILMN_1685433	COL8A1	ILMN_1908210
ILMN_1714730	UBE2C	ILMN_1699421	ANXA10
ILMN_1685403	MMP7	ILMN_1722489	TFF1
ILMN_1800091	RARRES1	ILMN_1699665	CLIC6
ILMN_1723412	ASCL2	ILMN_1748303	MUC5AC
ILMN_1752502	HKDC1	ILMN_1672148	AKR1B10
ILMN_1734445	LOC91461	ILMN_1798138	CHIA
ILMN_1789507	COL11A1	ILMN_1731073	CAPN9
ILMN_1811387	TFF3	ILMN_1716335	P2RXL1
ILMN_1892548		ILMN_1768469	TCN1
ILMN_1695404	LY6E	ILMN_1792323	HDC
ILMN_1672776	COL10A1	ILMN_1795298	GPR30
ILMN_1667460	SULF2	ILMN_1702503	ALDH3A1
ILMN_1721354	KRT6B	ILMN_1671478	CKB
ILMN_1795190	CLDN2	ILMN_1812824	SST
ILMN_1810172	SFRP4	ILMN_1806198	VSIG1
ILMN_1736078	THBS4	ILMN_1679647	CHIA
ILMN_1734653	FNDC1	ILMN_1787576	CLCNKA
ILMN_1773262	ESM1	ILMN_1700408	TRIM50A
ILMN_1755620	IER5L	ILMN_1794729	KRT20
ILMN_1714952	ZNF703	ILMN_1760088	CCKBR
ILMN_1686811	LOC402644	ILMN_1748899	TMED6
ILMN_1740586	PLA2G2A	ILMN_1783185	SOX21
ILMN_1725090	CTHRC1	ILMN_1666536	VSIG2
ILMN_1725750	LOC644695	ILMN_1719143	APOBEC2
ILMN_1671766	F12	ILMN_1732398	SCGB2A1
ILMN_1666733	IL8	ILMN_1811468	IRX3
ILMN_1686097	TOP2A	ILMN_1690923	CAPN9
ILMN_1695687	SALL4	ILMN_1816925
ILMN_1789007	APOC1	ILMN_1662795	CA2
ILMN_1807423	IGF2BP3	ILMN_1759910	SERPINA5
ILMN_1746257	DAZAP1	ILMN_1796337	UNQ473
ILMN_1706643	COL6A3	ILMN_1836218
ILMN_1751028	SERPINH1	ILMN_1764266	CKMT2
ILMN_1892859		ILMN_1732000	FLJ42875
ILMN_1781680	DAP3	ILMN_1661491	SH3GL2
ILMN_1729117	COL5A2	ILMN_1695924	KLK11
ILMN_1763907	C6orf173	ILMN_1715401	MT1G
ILMN_1757099	C10orf81	ILMN_1764309	ADH1A
ILMN_1751161	COL7A1	ILMN_1782937	LOC652358
ILMN_1656057	PLAU	ILMN_1804444	PDIA2
ILMN_1733756	COL12A1	ILMN_1657435	MT1M
ILMN_1692731	TTYH3	ILMN_1725139	CA9
ILMN_1784436	KIAA1688	ILMN_1808677	UGT2B17
ILMN_1794492	HOXC6	ILMN_1734878	CD79A
ILMN_1653028	COL4A1	ILMN_1757521	CKM
ILMN_1681754	GGH	ILMN_1715463	SOSTDC1
ILMN_1734276	TMEPAI	ILMN_1740717	ADH1C
ILMN_1674908	HOXB5	ILMN_1754920	LOC389429
ILMN_1708778	ASS	ILMN_1752028	PMS2L1
ILMN_1702125	HOXB7	ILMN_1677108	CAPN13
ILMN_1711566	TIMP1	ILMN_1776519	RAP1GA1
ILMN_1714523	HEPH	ILMN_1831106
ILMN_1787897	CXCL1	ILMN_1736162	GC
ILMN_1701424	LAMC2	ILMN_1671486	HOMER2
ILMN_1770454	AGRN	ILMN_1739813	HYAL1
ILMN_1676663	TNFRSF11B	ILMN_1687625	DPCR1
ILMN_1688205	KLK10	ILMN_1791679	DNER
ILMN_1805750	IFITM3	ILMN_1824496
ILMN_1796589	TRIP13	ILMN_1656487	FGA
ILMN_1737184	CDCA7	ILMN_1778333	MMP24
ILMN_1683450	CDCA5	ILMN_1747683	AQP4
ILMN_1799243	ANXA13	ILMN_1692983	SULT2A1
ILMN_1789400	FOXD2	ILMN_1786989	NKX6-2
ILMN_1809417	LRFN4	ILMN_1680965	DEFB4
ILMN_1704294	CDH3	ILMN_1760153	GATA5
ILMN_1745570	KLK7	ILMN_1804339	CAMK1G
ILMN_1726448	MMP1	ILMN_1701975	SLC9A4
ILMN_1781943	C20orf129	ILMN_1662587	C9orf111
ILMN_1724994	COL4A2	ILMN_1665425	RPRM
ILMN_1792455	RIS1	ILMN_1799815	XYLT2
ILMN_1711894	MYB	ILMN_1799887	CTSE
ILMN_1728684	PELP1	ILMN_1795257	GPT
ILMN_1731349	HOXA13	ILMN_1693119	LOC130576
ILMN_1663866	TGFBI	ILMN_1657087	ZNF533
ILMN_1739645	ANLN	ILMN_1655613	GSTA2
ILMN_1657862	AHCY	ILMN_1768016	TNFRSF17
ILMN_1690170	CRABP2	ILMN_1696284	CLDN18
ILMN_1777564	MAD2L1	ILMN_1766264	PI16
ILMN_1769388	GJB2	ILMN_1804005	FBP2
ILMN_1691290	CELSR3	ILMN_1713266	FAM46C
ILMN_1666305	CDKN3	ILMN_1809259	HRASLS2
ILMN_1686981	SULF2	ILMN_1709348	ALDH1A1
ILMN_1785272	COL1A2	ILMN_1779228	CDH2
ILMN_1710644	MARVELD3	ILMN_1803686	ADA
ILMN_1663575	STEAP1	ILMN_1779017	FGA
ILMN_1806387	LOC340598	ILMN_1702858	ADHFE1
ILMN_1686116	THBS1	ILMN_1873456
ILMN_1756326	CKS2	ILMN_1718766	MT1F
ILMN_1779147	ENC1	ILMN_1652199	LOC642113
ILMN_1701289	MGC40489	ILMN_1705125	LOC646401
ILMN_1761560	PHF13	ILMN_1763834	APLP1
ILMN_1815184	ASPM	ILMN_1772537	SCTR
ILMN_1765574	TFAP2A	ILMN_1726666	GPX3
ILMN_1739496	PRRX1	ILMN_1761566	ORF1-FL49
ILMN_1747016	CEP55	ILMN_1656285	METTL7A
ILMN_1796712	S100A10	ILMN_1687757	LOC648517
ILMN_1696339	ZIC2	ILMN_1739726	JSRP1
ILMN_1791726	TUBB3	ILMN_1683121	CYP2C18
ILMN_1679280	LOC643997	ILMN_1748323	CXCL14
ILMN_1702197	C9orf140	ILMN_1707448	CRKRS
ILMN_1808591	UBE2S	ILMN_1777190	CFD
ILMN_1715693	LOC440160	ILMN_1746819	C5
ILMN_1705407	LOC642019	ILMN_1791711	LOC405753
ILMN_1670353	RAD51AP1	ILMN_1699214	LOC647450
ILMN_1778360	PYGB	ILMN_1757807	AGXT2L1
ILMN_1787981	MFAP2	ILMN_1680390	GCNT2
ILMN_1800540	CD55	ILMN_1811049	POU2AF1
ILMN_1773079	COL3A1	ILMN_1775170	MT1X
ILMN_1787410	ITGB4BP	ILMN_1756469	GAMT
ILMN_1810474	UBE2I	ILMN_1652826	LRRC17
ILMN_1719661	SEPX1	ILMN_1782412	IRX2
ILMN_1710740	C2	ILMN_1689043	DRD5
ILMN_1756696	USF2	ILMN_1668125	MYRIP
ILMN_1744611	WDSOF1	ILMN_1803094	PDGFD
ILMN_1654324	HEYL	ILMN_1852022
ILMN_1790953	CKAP1	ILMN_1777221	C21orf51
ILMN_1661750	VIL1	ILMN_1674593	SIGLEC11
ILMN_1711470	UBE2T	ILMN_1681670	SLC25A4
ILMN_1800412	BMP1	ILMN_1791253	FBXL13
ILMN_1707169	AGMAT	ILMN_1713124	AKR1C3
ILMN_1677636	COMP	ILMN_1808238	RBPMS2
ILMN_1815057	PDGFRB	ILMN_1800425	SLC9A1
ILMN_1661825	TNFRSF6B	ILMN_1701831	GSTA1
ILMN_1753196	PTTG1	ILMN_1837428
ILMN_1676099	SPON2	ILMN_1730229	CGNL1
ILMN_1755354	YBX2	ILMN_1796737	APM-1
ILMN_1680196	LAPTM4B	ILMN_1796801	ABCA8
ILMN_1714592	CDA	ILMN_1709847	KCNJ13
ILMN_1719870	FAM72A	ILMN_1739508	LOC652493
ILMN_1693985	JPH1	ILMN_1738849	SLC9A2
ILMN_1710844	PARP10	ILMN_1676822	ECRG4
ILMN_1698706	NID2	ILMN_1759312	AMPD1
ILMN_1672611	CDH11	ILMN_1687235	HPN
ILMN_1775566	ATP1A1	ILMN_1766079	SULT1C1
ILMN_1748352	CTSL2	ILMN_1792182	RDH12
ILMN_1774685	IL24	ILMN_1731785	ORM2
ILMN_1696585	C20orf42	ILMN_1906437
ILMN_1705814	LOC144501	ILMN_1775814	GHR
ILMN_1721868	LOC643995	ILMN_1714383	TPD52L1
ILMN_1800573	RPS21	ILMN_1810942	CYP3A5
ILMN_1711899	ANXA2	ILMN_1790317	RAB26
ILMN_1694177	PCNA	ILMN_1763852	ACACB
ILMN_1698100	ANXA2P1	ILMN_1709094	LIFR
ILMN_1722073	WBSCR14	ILMN_1727178	FLJ45803
ILMN_1747593	ISLR	ILMN_1785284	ALDH6A1
ILMN_1682428	C1orf59	ILMN_1804662	NRG4
ILMN_1706386	SLC39A4	ILMN_1887357
ILMN_1714158	PON2	ILMN_1683102	SLC26A9
ILMN_1772521	MTHFD1L	ILMN_1699521	KIAA1641
ILMN_1661577	MAFA	ILMN_1878007
ILMN_1741133	NME1	ILMN_1761946	PROM2
ILMN_1713764	LOC440928	ILMN_1740917	SCNN1B
ILMN_1787815	TRIB3	ILMN_1795300	FLJ41603
ILMN_1765557	OLFML2B	ILMN_1808245	RPESP
ILMN_1776653	SCML1	ILMN_1724211	GPRC5C
ILMN_1716815	CEACAM1	ILMN_1752214	UGT2B17
ILMN_1776674	SAC3D1	ILMN_1706483	C1orf116
ILMN_1768940	COL15A1	ILMN_1761084	FNDC5
ILMN_1737728	CDCA3	ILMN_1773006	FABP4
ILMN_1728934	PRC1	ILMN_1680070	LOC642724
ILMN_1751328	FLJ46072	ILMN_1791123	TMPRSS2
ILMN_1770678	CBX2	ILMN_1741597	LOC650200
ILMN_1700810	HSPCAL3	ILMN_1677200	CYFIP2
ILMN_1656424	LOC645472	ILMN_1673175	TNFSF11
ILMN_1734316	YME1L1	ILMN_1681634	PXMP2
ILMN_1803775	HSPE1	ILMN_1677920	LTF
ILMN_1705750	TGM2	ILMN_1664236	ADAM28
ILMN_1809590	Pfs2	ILMN_1660086	MYH11
ILMN_1682599	GPRC5A	ILMN_1690040	TM7SF2
ILMN_1792710	DAPK3	ILMN_1872974
ILMN_1806040	TYMS	ILMN_1776516	ITPKA
ILMN_1769702	GPAA1	ILMN_1660727	ENPP5
ILMN_1692261	EPHB1	ILMN_1653026	PLAC8
ILMN_1677765	LRP8	ILMN_1661733	FOLR1
ILMN_1673673	PBK	ILMN_1718968	MT1E
ILMN_1708160	KPNA2	ILMN_1759075	TNFRSF13B
ILMN_1770293	KLF5	ILMN_1713759	UBE2J1
ILMN_1799020	MUC12	ILMN_1695745	DISP1
ILMN_1682737	CHRDL2	ILMN_1774375	LOC284422
ILMN_1716445	DTYMK	ILMN_1807894	SLC7A8
ILMN_1677511	PTGS2	ILMN_1703326	GPR44
ILMN_1688722	IL13RA2	ILMN_1652797	LOC400451
ILMN_1701195	PLA2G7	ILMN_1779015	ZNF467
ILMN_1765621	HDGF	ILMN_1766261	SLC2A12
ILMN_1712888	HSPH1	ILMN_1672605	Ells1
ILMN_1747911	CDC2	ILMN_1778650	VILL
ILMN_1798030	XPR1	ILMN_1791912	SIDT2
ILMN_1742981	TUBA1A	ILMN_1658649	C3orf57
ILMN_1702973	FLJ13391	ILMN_1811598	ADH1B
ILMN_1762883	MGC2408	ILMN_1679391	MAMDC2
ILMN_1796099	LOC644380	ILMN_1714990	DBT
ILMN_1676413	VSNL1	ILMN_1729237	CYB5R1
ILMN_1796490	GRINA	ILMN_1765310	TCEAL2
ILMN_1705301	TEAD4	ILMN_1790160	KIT
ILMN_1690939	ECGF1	ILMN_1666985	LOC643847
ILMN_1806733	COL18A1	ILMN_1743445	FAM107A
ILMN_1779353	PUS7	ILMN_1729734	MFSD4
ILMN_1672650	PKM2	ILMN_1796094	CD36
ILMN_1785756	H2AFX	ILMN_1708107	DPT
ILMN_1727589	SULT2B1	ILMN_1731062	NPY
ILMN_1665792	ITGA2	ILMN_1695891	LOC652775
ILMN_1766713	HSPD1	ILMN_1719616	DNASE1
ILMN_1712803	CCNB1	ILMN_1672795	SH2D5
ILMN_1721411	PARP10	ILMN_1725193	IGFBP2
ILMN_1710221	GPR35	ILMN_1761260	COBLL1
ILMN_1718898	HOXC9	ILMN_1691156	MT1A
ILMN_1676563	HTRA1	ILMN_1804735	CBS
ILMN_1731720	PDRG1	ILMN_1718984	FCGBP
ILMN_1811114	SDS	ILMN_1720282	NQO1
ILMN_1744487	C1QTNF5	ILMN_1763390	ISL1
ILMN_1784860	RFC3	ILMN_1675819	FAM101A
ILMN_1660554	VWA1	ILMN_1757892	LOC648657
ILMN_1712046	CPXM	ILMN_1651964	ABCC5
ILMN_1799103	SNRPB	ILMN_1799015	PXMP2
ILMN_1659106	PHLDA3	ILMN_1695590	ADRB2
ILMN_1726659	THOP1	ILMN_1761131	PECI
ILMN_1787628	NOL5A	ILMN_1765326	DGKD
ILMN_1732176	AGPAT2	ILMN_1788184	CIDEA
ILMN_1733094	STEAP1	ILMN_1733415	MFAP5
ILMN_1691117	DNTTIP1	ILMN_1655261	C12orf46
ILMN_1739582	HOXA9	ILMN_1775235	AFF3
ILMN_1802252	GAPDH	ILMN_1709590	PGM5
ILMN_1746465	FJX1	ILMN_1812721	HIP1R
ILMN_1712545	S100A3	ILMN_1748124	TSC22D3
ILMN_1709451	TFPT	ILMN_1751062	SCARA5
ILMN_1664516	CENPF	ILMN_1663640	MAOA
ILMN_1721046	PTMS	ILMN_1667037	LOC653827
ILMN_1715508	NNMT	ILMN_1695946	LOC388610
ILMN_1808707	FSCN1	ILMN_1795342	MLPH
ILMN_1781942	HMMR	ILMN_1729203	PDILT
ILMN_1766658	PKMYT1	ILMN_1659913	ISG20
ILMN_1730355	FGFR4	ILMN_1735578	GUCA2B
ILMN_1744381	SERPINE1	ILMN_1783690	LOC388743
ILMN_1712628	GTF2IRD1	ILMN_1742444	UGT2B10
ILMN_1735996	NOX4	ILMN_1769433	IQGAP2
ILMN_1779234	CXCL6	ILMN_1742534	COL4A5
ILMN_1782618	C9orf16	ILMN_1682176	CLEC3B
ILMN_1728049	S100A16	ILMN_1728009	PRP2
ILMN_1684217	AURKB	ILMN_1809384	CYP4F12
ILMN_1735461	DDX21	ILMN_1761820	EDARADD
ILMN_1785061	EPHB2	ILMN_1911542
ILMN_1759628	ATP1B3	ILMN_1772131	IL1R2
ILMN_1838320		ILMN_1744968	KCNAB1
ILMN_1801257	CENPA	ILMN_1720865	OSBPL7
ILMN_1773760	PAICS	ILMN_1724658	BNIP3
ILMN_1678300	LOC645625	ILMN_1776602	RNASE4
ILMN_1785732	TNFAIP6	ILMN_1770576	FLJ43505
ILMN_1703092	RECQL4	ILMN_1810881	ASB16
ILMN_1807359	CLEC11A	ILMN_1781388	PGM5
ILMN_1709294	CDCA8	ILMN_1738993	PIK3C2G
ILMN_1804530	LOC653888	ILMN_1706531	ABCC5
ILMN_1907095		ILMN_1678939	VNN2
ILMN_1776925	PRSS22	ILMN_1684982	PDK4
ILMN_1811790	FKHL18	ILMN_1704531	LTB4DH
ILMN_1750373	KAL1	ILMN_1811437	C11orf9
ILMN_1729197	LOC400879	ILMN_1736527	TFCP2L1
ILMN_1772189	ABCD1	ILMN_1674533	TRPV6
ILMN_1683905	C19orf21	ILMN_1810729	UBL3
ILMN_1682792	BYSL	ILMN_1728107	GNG7
ILMN_1776260	PPIAL4	ILMN_1680652	SELENBP1
ILMN_1699265	TNFRSF10B	ILMN_1795963	OSGIN1
ILMN_1787280	C1orf135	ILMN_1680110	C10orf116
ILMN_1658847	MGC61598	ILMN_1791447	CXCL12
ILMN_1750145	YWHAG	ILMN_1687268	SEC14L5
ILMN_1679800	BXDC2	ILMN_1791280	HSPB8
ILMN_1716616	MARVELD3	ILMN_1805842	FHL1
ILMN_1737475	ABHD11	ILMN_1760727	ANG
ILMN_1788107	IL11	ILMN_1664912	IL11RA
ILMN_1704785	C10orf125	ILMN_1734366	RORC
ILMN_1826921		ILMN_1695157	CA4
ILMN_1695271	RPP25	ILMN_1662878	MGC29506
ILMN_1746171	H2AFY	ILMN_1769782	LAX1
ILMN_1794711	LOC642477	ILMN_1682929	SYTL2
ILMN_1658695	NUF2	ILMN_1736670	PPP1R3C
ILMN_1714820	ITGB1	ILMN_1794875	HMFN0839
ILMN_1652445	RAC1	ILMN_1659227	CD79A
ILMN_1735156	SLC4A11	ILMN_1751886	REC8L1
ILMN_1728972	FAM64A	ILMN_1702696	AFAR3
ILMN_1651828	CCT3	ILMN_1688959	TNFRSF7
ILMN_1665583	TUBB	ILMN_1791531	FA2H
ILMN_1759277	OIP5	ILMN_1799669	PSORS1C1
ILMN_1652749	ERF	ILMN_1773901	STX12
ILMN_1664630	CHEK1	ILMN_1791329	FCRL2
ILMN_1767658	RRS1	ILMN_1675656	PPFIBP2
ILMN_1667081	CCND2	ILMN_1898518
ILMN_1717639	SNF1LK	ILMN_1761281	LOC441019
ILMN_1795852	CCNE1	ILMN_1771084	ACSM3
ILMN_1660691	RAB31	ILMN_1702487	SGK
ILMN_1694305	SMS	ILMN_1657373	LEPREL1
ILMN_1710428	CDC2	ILMN_1813561	SCIN
ILMN_1777397	MSX1	ILMN_1707464	MST1
ILMN_1719256	CKS1B	ILMN_1653496	GLUL
ILMN_1686679	ZNF462	ILMN_1746864	PSCDBP
ILMN_1758825	ABLIM2	ILMN_1745820	RASSF6
ILMN_1717809	RNF24	ILMN_1746888	PCOLCE2
ILMN_1791511	HCA112	ILMN_1775587	STX19
ILMN_1671933	GPSM2	ILMN_1693738	CTSE
ILMN_1690846	LOC642412	ILMN_1667796	HBA1
ILMN_1783304	ATP1B3	ILMN_1799725	DOCK2
ILMN_1786789	FAM102B	ILMN_1805665	FLRT3
ILMN_1671257	DKC1	ILMN_1735930	KLF2
ILMN_1801246	IFITM1	ILMN_1815319	CMTM4
ILMN_1658407	SLC43A3	ILMN_1718621	TSPAN32
ILMN_1736481	SECISBP2	ILMN_1682567	HSU79303
ILMN_1664030	RAB1B	ILMN_1687247	SPATA20
ILMN_1693014	CEBPB	ILMN_1652379	SUCLG2
ILMN_1703946	ADORA2B	ILMN_1740466	FAM46A
ILMN_1656898	LOC653324	ILMN_1726893	EPN3
ILMN_1780546	OSM	ILMN_1784967	EPB41L4B
ILMN_1670841	CPNE1	ILMN_1719404	TRIM50B
ILMN_1687384	G1P3	ILMN_1685122	COL9A2
ILMN_1695509	PTPN12	ILMN_1793474	INSIG1
ILMN_1684795	PRND	ILMN_1794190	CCPG1
ILMN_1665865	IGFBP4	ILMN_1780236	PMM1
ILMN_1742866	F2R	ILMN_1725597	FXYD4
ILMN_1769299	MTMR11	ILMN_1800008	ACAT1
ILMN_1808071	KIF14	ILMN_1674661	CIRBP
ILMN_1681503	MCM2	ILMN_1796461	PRSS8
ILMN_1751776	FLJ40629	ILMN_1802100	ADAM28
ILMN_1707720	SLC1A5	ILMN_1824665
ILMN_1757011	LY75	ILMN_1763704	RGS11
ILMN_1660341	LRPAP1	ILMN_1758672	FAM107B
ILMN_1653042	HSD3B7	ILMN_1747067	NPAS1
ILMN_1807652	STRA6	ILMN_1718520	C10orf59
ILMN_1749297	ACTL6A	ILMN_1711699	HIP1R
ILMN_1343295	GAPDH	ILMN_1721549	PLA2G1B
ILMN_1673721	EXO1	ILMN_1803256	STOX2
ILMN_1760280	NXT1	ILMN_1709747	ENDOGL1
ILMN_1690105	STAT1	ILMN_1710622	NIP
ILMN_1708101	LMNB2	ILMN_1786278	DKFZP564J102
ILMN_1717490	RPL6	ILMN_1766914	MFAP4
ILMN_1731184	MELK	ILMN_1799848	ANKRD22
ILMN_1807106	LDHA	ILMN_1772627	D4S234E
ILMN_1680955	AURKA	ILMN_1655930	ELL2
ILMN_1703906	DKFZp762E1312	ILMN_1818346
ILMN_1657766	TRIM29	ILMN_1652906	GBGT1
ILMN_1652085	MPHOSPH10	ILMN_1764850	HPCAL1
ILMN_1804051	SNX8	ILMN_1693341	SNRPN
ILMN_1719611	CCT6A	ILMN_1794829	C6orf117
ILMN_1801939	CCNB2	ILMN_1803367	EVI1
ILMN_1776047	LOC646197	ILMN_1740609	CCL14
ILMN_1765085	CGI-09	ILMN_1713892	C4orf34
ILMN_1800958	ALS2CR4	ILMN_1705116	C6orf85
ILMN_1727055	C12orf48	ILMN_1703337	LOC441763
ILMN_1657949	RHEB	ILMN_1670652	CYP2C9
ILMN_1695658	KIF20A	ILMN_1749834	LOC388588
ILMN_1664511	KNTC2	ILMN_1792168	GALE
ILMN_1797585	MYO1B	ILMN_1755954	CPEB3
ILMN_1746013	SPOCK	ILMN_1728132	LDHB
ILMN_1654319	HAPLN3	ILMN_1768705	SYT4
ILMN_1683969	FKBP1A	ILMN_1804798	BEXL1
ILMN_1659364	RFC5	ILMN_1815719	PLCG2
ILMN_1759097	MLLT11	ILMN_1741175	RAB11FIP2
ILMN_1715583	BOP1	ILMN_1754507	IRF4
ILMN_1809850	RCN3	ILMN_1779886	TBC1D14
ILMN_1674243	TFRC	ILMN_1898723
ILMN_1727194	CALU	ILMN_1697448	TXNIP
ILMN_1714433	MARCKSL1	ILMN_1671568	ECHDC2
ILMN_1671603	THRAP6	ILMN_1657893	TXNRD2
ILMN_1748427	ZNF239	ILMN_1708798	EAF2
ILMN_1736575	TRIM28	ILMN_1695110	BCAT2
ILMN_1750101	S100A11	ILMN_1771987	SLC44A2
ILMN_1696360	CTSB	ILMN_1803528	LRRC31
ILMN_1711005	CDC25A	ILMN_1796206	LOC642678
ILMN_1656129	SLC39A10	ILMN_1807455	DHRS7
ILMN_1731699	RAB15	ILMN_1795181	FLJ20035
ILMN_1811472	KIF23	ILMN_1751885	GPR64
ILMN_2038778	GAPDH	ILMN_1752935	TMEM30B
ILMN_1685916	KIF2C	ILMN_1721106	C14orf159
ILMN_1701643	GDPD5	ILMN_1752510	FAM13A1
ILMN_1695962	SLC12A9	ILMN_1715991	SDPR
ILMN_1789001	SLC35B2	ILMN_1754865	PABPC4
ILMN_1760143	ADRM1	ILMN_1751851	CECR1
ILMN_1739393	SELE	ILMN_1751753	IDH2
ILMN_1726720	NUSAP1	ILMN_1719599	SYTL4
ILMN_1740291	POLQ	ILMN_1660114	MMRN1
ILMN_1689001	CDK4	ILMN_1751020	PACSIN1
ILMN_1654322	ATP1B3	ILMN_1736184	GSTM3
ILMN_1690063	LOC651143	ILMN_1721540	LOC284434
ILMN_1752953	BCL2L12	ILMN_1778173	AK3
ILMN_1751444	HCAP-G	ILMN_1684246	C1orf125
ILMN_1741755	TRIM29	ILMN_1651253	LOC644150
ILMN_1716265	PGM2L1	ILMN_1904851
ILMN_1671906	MND1	ILMN_1762718	CMTM4
ILMN_1674394	C20orf3	ILMN_1677607	SC5DL
ILMN_1666546	DUSP14	ILMN_1767129	ABCC8
ILMN_1673711	HSP90AB1	ILMN_1688228	LOC145837
ILMN_1798256	UPP1	ILMN_1679919	ASCC2
ILMN_1745420	PHF19	ILMN_1716407	SORBS2
ILMN_1718128	PABPC3	ILMN_1670718	C18orf51
ILMN_1791466	HMGB1	ILMN_1913678
ILMN_1724295	LOC643007	ILMN_1696974	RNASE4
ILMN_1737394	LMNA	ILMN_1665943	MAP4K1
ILMN_1654773	CASK	ILMN_1744534	LOC144363
ILMN_1659990	HIG2	ILMN_1719543	MAF
ILMN_1678966	SNRPF	ILMN_1738438	LOC375449
ILMN_1733421	PRKCQ	ILMN_1710410	CHRM3
ILMN_1663035	SREBF1	ILMN_1742390	FRMD1
ILMN_1720526	C16orf60	ILMN_1791494	SYNPO2
ILMN_1730670	FSTL3	ILMN_1660000	SNRPN
ILMN_1698766	PYCARD	ILMN_1687440	HIPK2
ILMN_1665538	SKP2	ILMN_1694589	PAQR8
ILMN_1676938	LOC649214	ILMN_1683923	MT1H
ILMN_1669557	LOC647881	ILMN_1742382	RIMS3
ILMN_1741054	SLC5A6	ILMN_1656300	GFRA2
ILMN_1734950	LOXL1	ILMN_1651415	DERL3
ILMN_1691487	TRAF2	ILMN_1723481	CHST3
ILMN_1679267	TGM2	ILMN_1673998	SSTR1
ILMN_1684045	CDCA4	ILMN_1788108	TXNDC5
ILMN_1722102	ANAPC11	ILMN_1695193	ANGPTL3
ILMN_1810423	RPP40	ILMN_1797154	AZGP1
ILMN_1762808	LOC651919	ILMN_1664631	ADAM28
ILMN_1783285	CTPS	ILMN_1736238	GNMT
ILMN_1677851	RARRES1	ILMN_1663092	CITED2
ILMN_1677906	LOC643287	ILMN_1665859	RAB27A
ILMN_1786065	UHRF1	ILMN_1695978	LRRN6C
ILMN_1811433	RPL8	ILMN_1713927	UNQ689
ILMN_1759766	CTXN1	ILMN_1814215	SCNN1G
ILMN_1680091	POP7	ILMN_1668052	FOXA2
ILMN_1749243	BANF1	ILMN_1813338	LAG3
ILMN_1745798	GTF2F2	ILMN_1747451	PLCXD1
ILMN_1719286	PPGB	ILMN_1746784	FLJ30046
ILMN_1662166	PTK7	ILMN_1784863	CD36
ILMN_1696311	IMPAD1	ILMN_1655563	KIAA0427
ILMN_1689037	LIPG	ILMN_1776936	ANKRD38
ILMN_1814998	FKSG30	ILMN_1893555
ILMN_1800276	RCN1	ILMN_1674650	C9orf95
ILMN_1898124		ILMN_1781745	C9orf152
ILMN_1671843	PSRC1	ILMN_1727098	PPP1R16B
ILMN_1807169	TINAGL1	ILMN_1697793	SYNJ2BP
ILMN_1703324	PDSS1	ILMN_1675857	COL4A6
ILMN_1794914	UBTD1	ILMN_1794595	GAMT
ILMN_1679867	LOC642269	ILMN_1804419	LRMP
ILMN_1745271	EXOSC4	ILMN_1667416	TRIM74
ILMN_1677404	RAP2A	ILMN_1751227	LOC401321
ILMN_1724250	GRN	ILMN_1745849	ENTPD5
ILMN_1711314	NUDT5	ILMN_1743078	LOC643031
ILMN_1677509	PRR7	ILMN_1709681	GABRB3
ILMN_1693388	NOXO1	ILMN_1792538	CD7
ILMN_1854469		ILMN_1771964	GSTA4
ILMN_1766637	GLA	ILMN_1738784	PPP2R5A
ILMN_1810752	C4BPA	ILMN_1705403	CYP2S1
ILMN_1740923	C20orf54	ILMN_1789653	MAWBP
ILMN_1812403	BCAP31	ILMN_1761637	CNTD
ILMN_1770787	DDAH2	ILMN_1698259	TMEM100
ILMN_1704672	OBFC2B	ILMN_1666967	BRP44L
ILMN_1803559	LOC440157	ILMN_1675130	NFIC
ILMN_1658531	LOC653949	ILMN_1808114	XLKD1
ILMN_1764729	JAG2	ILMN_1789266	CCDC25
ILMN_1655642	KIAA1794	ILMN_1736939	UGCG
ILMN_1687036	MRPL47	ILMN_1810797	WASF3
ILMN_1659725	EXOSC5	ILMN_1688242	C6
ILMN_1654289	ELK1	ILMN_1696028	ETNK1
ILMN_1779735	LOC389541	ILMN_1778523	KLF9
ILMN_1721495	ADAMTSL2	ILMN_1702787	SEMA4A
ILMN_1727462	ARSE	ILMN_1735347	MCEE
ILMN_1718558	PARP12	ILMN_1780132	PELI2
ILMN_1804461	MYH14	ILMN_1870668
ILMN_1703955	FBXO32	ILMN_1655913	NUCB2
ILMN_1790100	FLJ25416	ILMN_1733627	NEDD4L
ILMN_1718285	HOXC8	ILMN_1761093	B3GAT1
ILMN_1673352	IFITM2	ILMN_1747577	ALAD
ILMN_1774823	RPL34	ILMN_1721762	IL18RAP
ILMN_1720124	RCC2	ILMN_1811632	FMO5
ILMN_1793959	ADPGK	ILMN_1681437	DCXR
ILMN_1749829	DLG7	ILMN_1727805	SYNGR1
ILMN_1737195	FKSG14	ILMN_1651498	GADD45G
ILMN_1804851	MRPS17	ILMN_1795336	PTER
ILMN_1753312	PLXDC2	ILMN_1676003	PNOC
ILMN_1705849	SPR	ILMN_1819608
ILMN_1809439	HMG1L1	ILMN_1801833	ARHGAP24
ILMN_1786189	MKI67IP	ILMN_1785095	ATP6V0E2L
ILMN_1658607	DLEU2	ILMN_1793615	ME3
ILMN_1815012	EXOC7	ILMN_1813544	OXCT1
ILMN_1651617	CTNNB1	ILMN_1723535	P2RY2
ILMN_1786125	CCNA2	ILMN_1719906	HADHSC
ILMN_1799535	GJB1	ILMN_1777644	PIB5PA
