# Supplementary material for: Gene Expression Signature Analysis Identifies Vorinostat as a Candidate Therapy for Gastric Cancer
Source: PLoS One. 2011 Sep 9;6(9):e24662. doi: 10.1371/journal.pone.0024662 (PMC3170379; doi:10.1371/journal.pone.0024662)
Supplement: Table S2 — A list of 80 autophagy-related genes (149 probes), used for supervised analysis ( Figure 2B ). (XLS) [file pone.0024662.s003.xls]

## Sheet: AGS KATO III saha ATG g149 clus
Table S2. A list of 80 autophagy-related genes (149 probes), used for supervised analysis (Figure 2B)
Unique id	Gene symbol	Unique id	Gene symbol	Unique id	Gene symbol
ILMN_1748661	AKT1	ILMN_1731639	CASP3	ILMN_1666966	INS
ILMN_2388507	AKT1	ILMN_2388155	CASP3	ILMN_1687277	IRGM
ILMN_2410909	AKT1	ILMN_1809313	CASP8	ILMN_1772958	MAP1LC3A
ILMN_1662681	AMBRA1	ILMN_2377733	CASP8	ILMN_1711986	MAP1LC3A
ILMN_1653283	APP	ILMN_1787749	CASP8	ILMN_1776188	MAP1LC3A
ILMN_2404063	APP	ILMN_1669565	CASP8	ILMN_1703244	MAP1LC3B
ILMN_2404065	APP	ILMN_1673757	CASP8	ILMN_1737627	MAPK14
ILMN_2047240	ARSA	ILMN_1722811	CDKN1B	ILMN_1788002	MAPK14
ILMN_1656477	ARSA	ILMN_2196347	CDKN1B	ILMN_1720656	MAPK14
ILMN_2206098	ATG10	ILMN_1717714	CDKN2A	ILMN_2388090	MAPK14
ILMN_1748968	ATG10	ILMN_1757255	CDKN2A	ILMN_2364574	MAPK8
ILMN_1673898	ATG12	ILMN_1744295	CDKN2A	ILMN_2308806	MAPK8
ILMN_2188204	ATG12	ILMN_1669281	CLN3	ILMN_1714965	NFKB1
ILMN_1725707	ATG16L1	ILMN_2394381	CLN3	ILMN_1687896	PIK3C3
ILMN_2365881	ATG16L1	ILMN_2359742	CTSB	ILMN_1770433	PIK3CG
ILMN_1664644	ATG16L2	ILMN_1696360	CTSB	ILMN_1715832	PIK3R4
ILMN_1769566	ATG3	ILMN_1743032	CTSS	ILMN_1783889	PRKAA1
ILMN_2163732	ATG3	ILMN_2246410	CXCR4	ILMN_2357577	PRKAA1
ILMN_2313782	ATG4A	ILMN_2320888	CXCR4	ILMN_1668778	PRKAA2
ILMN_1768960	ATG4A	ILMN_1801584	CXCR4	ILMN_1701134	PTEN
ILMN_1691173	ATG4B	ILMN_1708340	DAPK1	ILMN_1677843	RAB24
ILMN_2411915	ATG4B	ILMN_1669376	DRAM	ILMN_1714393	RAB24
ILMN_1700923	ATG4C	ILMN_1724984	EIF2AK3	ILMN_2278850	RAB24
ILMN_2383727	ATG4C	ILMN_1672902	EIF4G1	ILMN_2379718	RAB24
ILMN_1801905	ATG4D	ILMN_1768470	EIF4G1	ILMN_1799765	RAB24
ILMN_2180315	ATG4D	ILMN_2370772	EIF4G1	ILMN_1696591	RB1
ILMN_1718265	ATG5	ILMN_1678244	EIF4G1	ILMN_1656011	RGS1
ILMN_1790978	ATG7	ILMN_1678535	ESR1	ILMN_1704557	RPS6KB1
ILMN_1739008	ATG9A	ILMN_1758658	FADD	ILMN_1701933	SNCA
ILMN_2296290	ATG9A	ILMN_1808132	FAS	ILMN_1766165	SNCA
ILMN_2410975	ATG9A	ILMN_2319077	FAS	ILMN_1662618	SQSTM1
ILMN_1734655	ATG9B	ILMN_1765801	GAA	ILMN_2129668	TGFB1
ILMN_1720360	BAD	ILMN_2410783	GAA	ILMN_1705750	TGM2
ILMN_1685398	BAD	ILMN_2050109	GABARAP	ILMN_1679267	TGM2
ILMN_1738652	BAD	ILMN_2151281	GABARAPL1	ILMN_1797236	TGM2
ILMN_1805990	BAK1	ILMN_1796458	GABARAPL2	ILMN_1702973	TMEM166
ILMN_1683300	BAX	ILMN_2046315	GABARAPL2	ILMN_2066534	TMEM74
ILMN_2258383	BAX	ILMN_1727458	HDAC1	ILMN_1808634	TMEM77
ILMN_2321064	BAX	ILMN_1715994	HGS	ILMN_1728106	TNF
ILMN_1801119	BCL2	ILMN_1687546	HSP90AA1	ILMN_1801307	TNFSF10
ILMN_2246956	BCL2	ILMN_1691097	HSP90AA1	ILMN_1779356	TP53
ILMN_1701120	BCL2	ILMN_2373515	HSP90AA1	ILMN_1778188	TP73
ILMN_2363250	BCL2	ILMN_1686367	HSPA8	ILMN_1705144	ULK1
ILMN_1654118	BCL2L1	ILMN_2413084	HSPA8	ILMN_1735052	ULK1
ILMN_1742410	BCL2L1	ILMN_1698186	IFNA2	ILMN_1744560	ULK1
ILMN_1744822	BECN1	ILMN_1782448	IFNA4	ILMN_1761288	ULK1
ILMN_1763386	BID	ILMN_2202096	IFNA4	ILMN_1715482	ULK2
ILMN_2259495	BID	ILMN_2207291	IFNG	ILMN_1761069	UVRAG
ILMN_2372413	BID	ILMN_1709613	IGF1	ILMN_1909466	UVRAG
ILMN_1724658	BNIP3	ILMN_2056087	IGF1
